# Supplementary material
Source: PubMed Central journal article supplement (PMC5096786)

# Supplementary Figure 1

Large T-antigen  
+  
cell extract

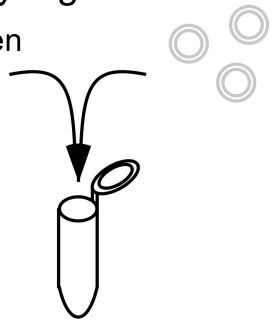

replication  
+  
purification

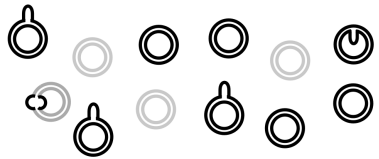

*DpnI* digest

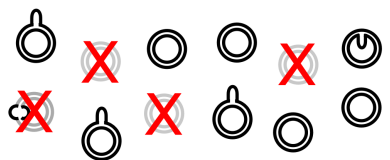

transform

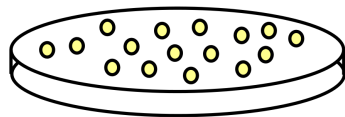

digest to release  
repeat fragments

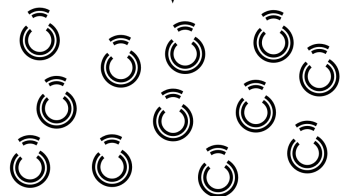

separate on  
4% polyacrylamide gel

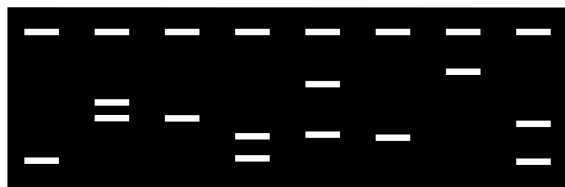

Supplement: NIHMS819325-supplement-Fig__S1.pdf [file NIHMS819325-supplement-Fig__S1.pdf]
