# Supplementary material
Source: PubMed Central journal article supplement (PMC5096786)
Supplement: NIHMS819325-supplement-Fig__S2.pdf [file NIHMS819325-supplement-Fig__S2.pdf]

Figure S2

A Representative sample set of pDM79E colonies

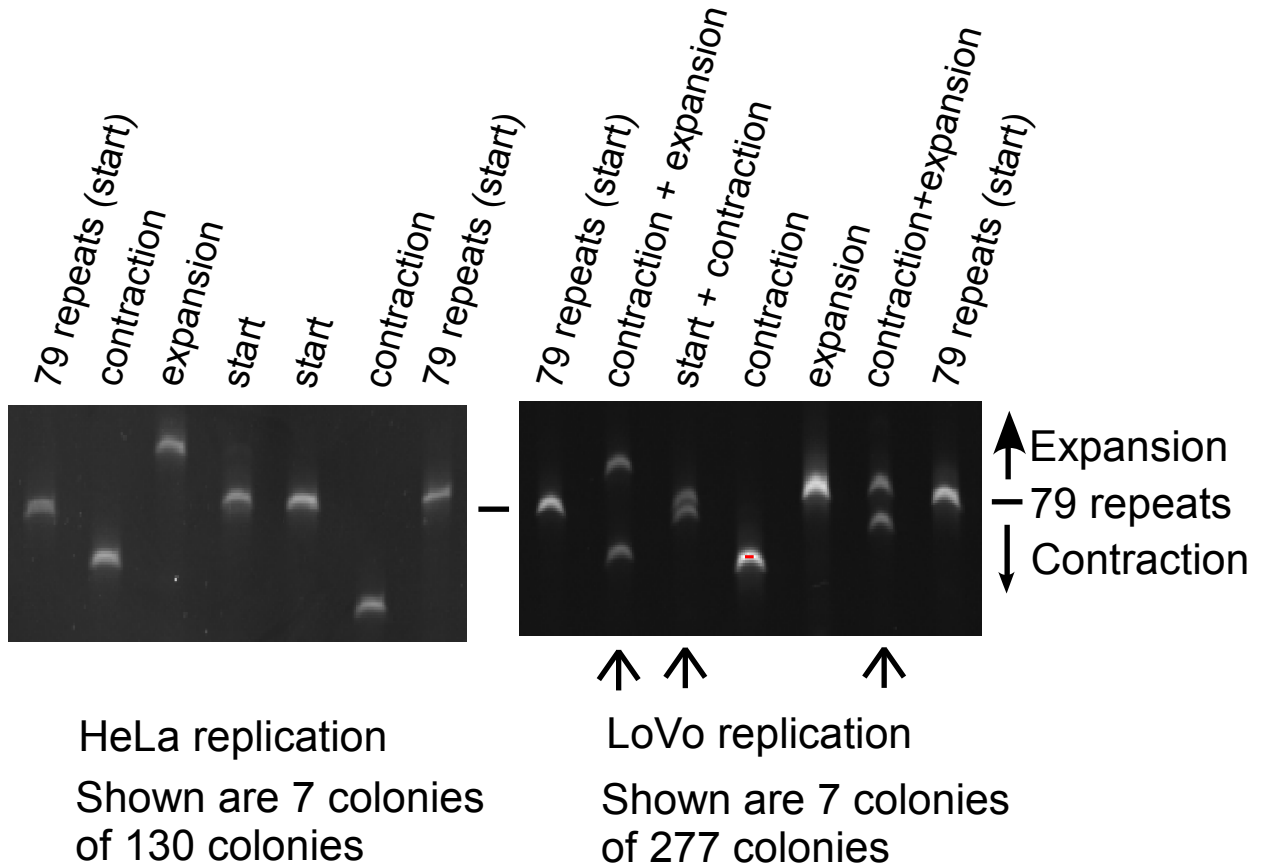

B Doublet colonies obtained with LoVo replication of pDM79E

| Types of doublets       | %  |
|-------------------------|----|
| Expansion/Expansion     | 3  |
| Expansion/Contraction   | 15 |
| Contraction/Contraction | 14 |
| Start/Expansion         | 18 |
| Start/Contraction       | 50 |
