# Supplementary material
Source: PubMed Central journal article supplement (PMC5096786)
Supplement: NIHMS819325-supplement-Fig__S6.pdf [file NIHMS819325-supplement-Fig__S6.pdf]

# Supplementary Figure 6

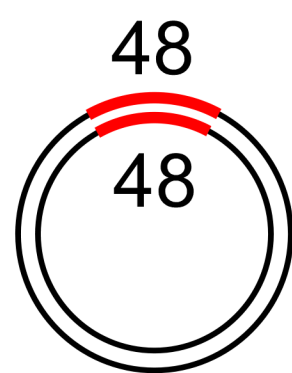

48/48 repeat homoduplex  
in DH5 $\alpha$

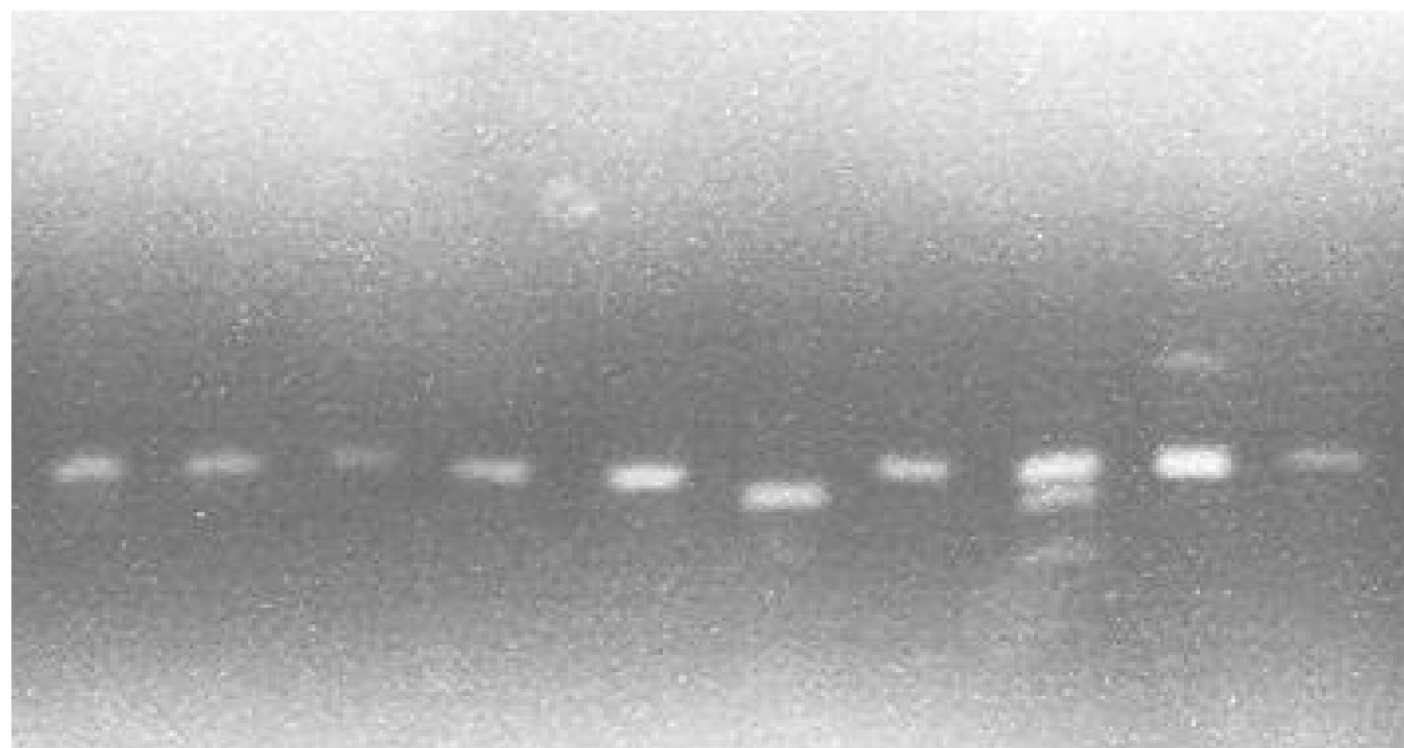

| Types of products       | %    | # colonies |
|-------------------------|------|------------|
| Start (48/48)           | 81.3 | 26         |
| Start/Expansion         | 6.3  | 2          |
| Start/Contraction       | 9.4  | 3          |
| Expansion/Expansion     | 0    | 0          |
| Expansion/Contraction   | 0    | 0          |
| Contraction/Contraction | 3    | 1          |
|                         |      | Total 32   |

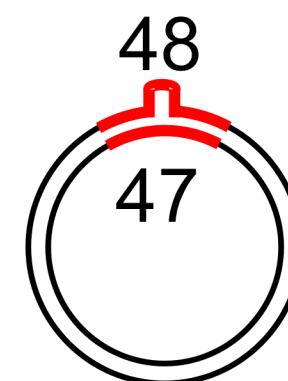

47/48 repeat heteroduplex  
in DH5 $\alpha$

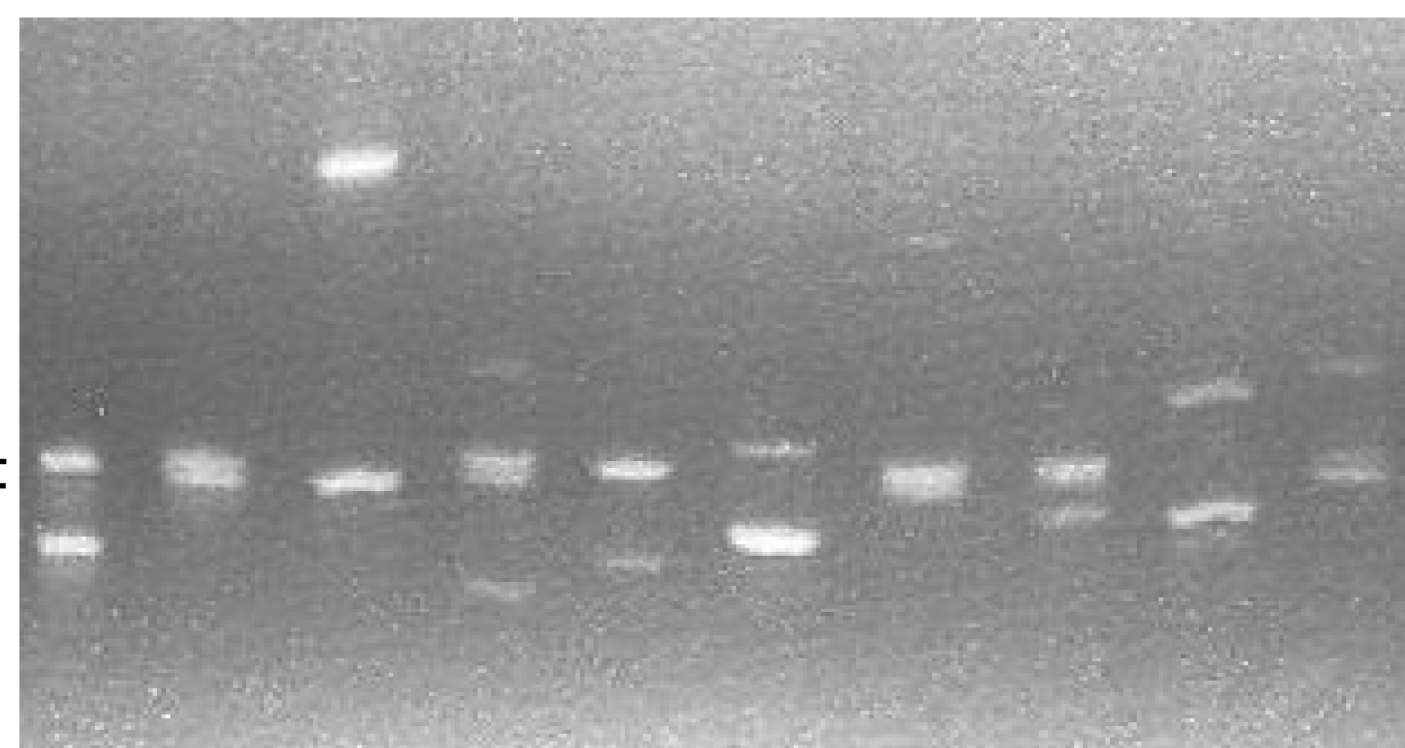

| Types of products       | %    | # colonies |
|-------------------------|------|------------|
| Start/Start (47/48)     | 23.7 | 18         |
| Start/Expansion         | 18.4 | 14         |
| Start/Contraction       | 36.8 | 28         |
| Expansion/Expansion     | 5.3  | 4          |
| Expansion/Contraction   | 11.8 | 9          |
| Contraction/Contraction | 4    | 3          |
|                         |      | Total 76   |

# of doublets in 48/48 (<20%) vs 47/48 (100% most not equal to input lengths) are significantly different ( $p= 2.7^{E-08}$ )
