# Supplementary material
Source: PubMed Central journal article supplement (PMC5096786)

# Supplementary Figure 3

**A**

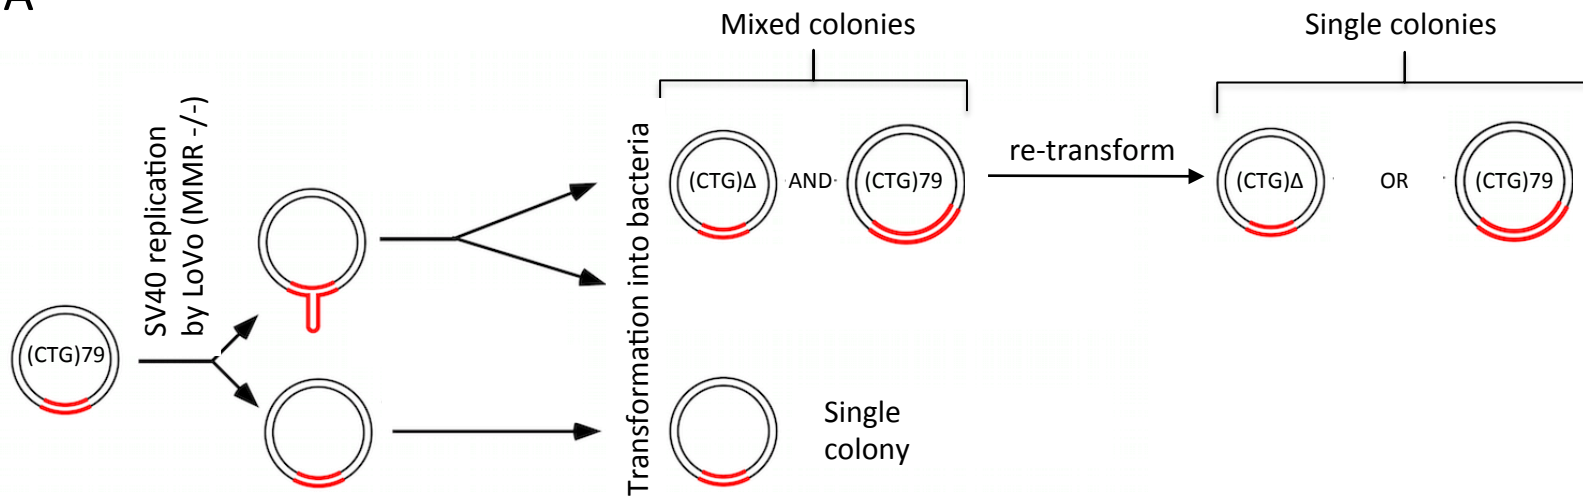

**B**

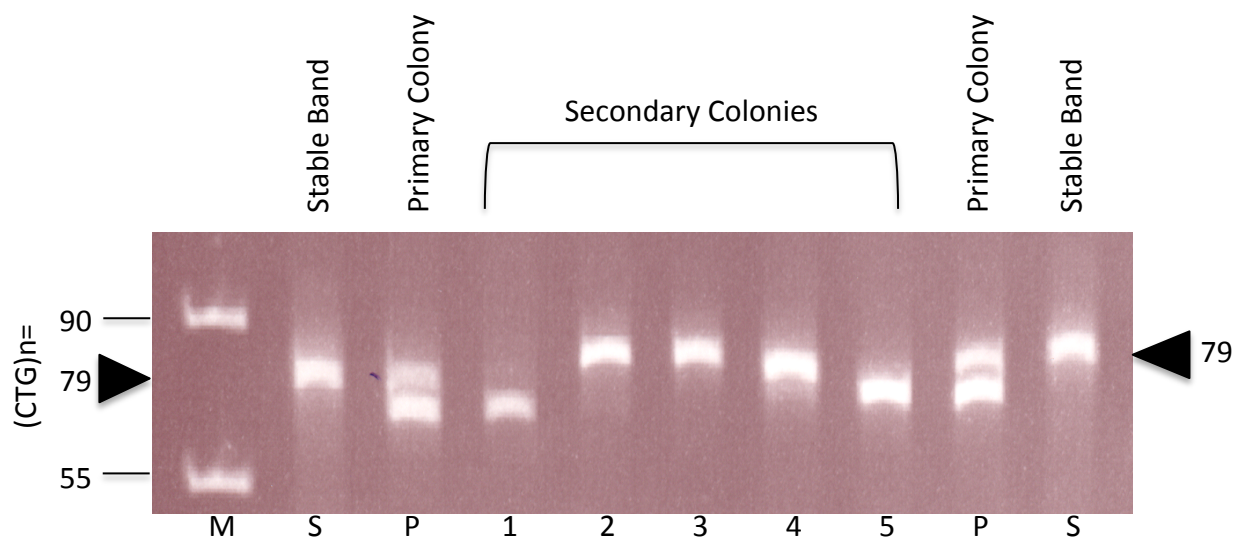

Supplement: NIHMS819325-supplement-Fig__S3.pdf [file NIHMS819325-supplement-Fig__S3.pdf]

# Supplementary Figure 4

A

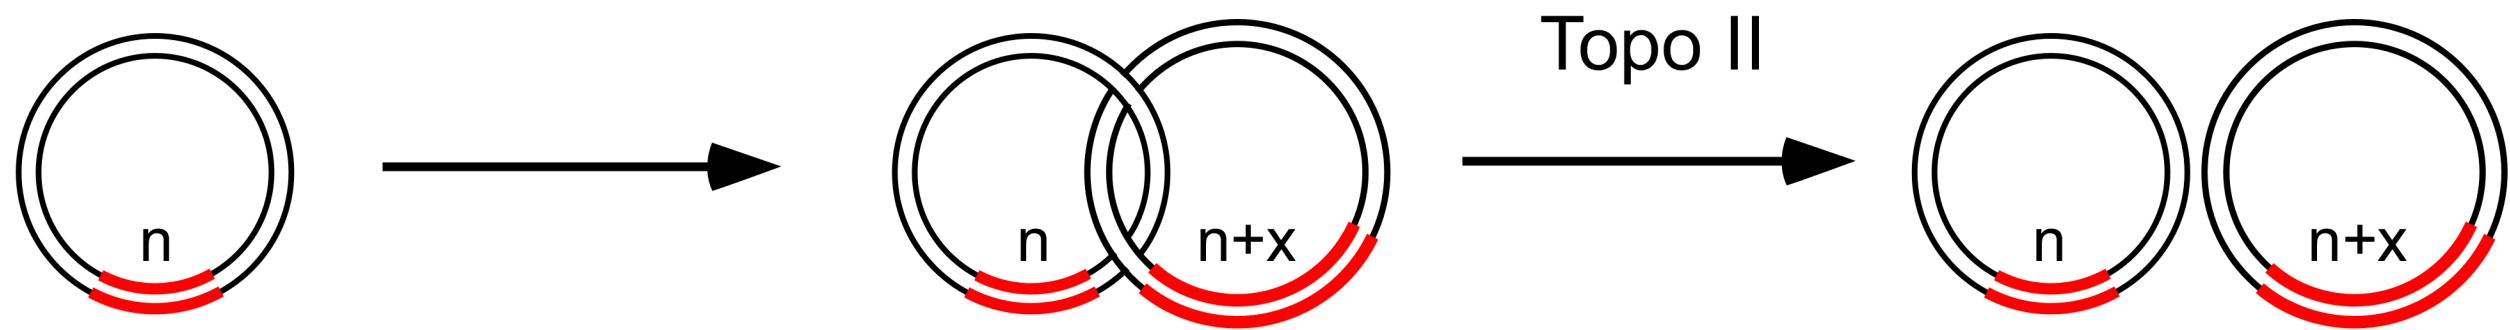

B

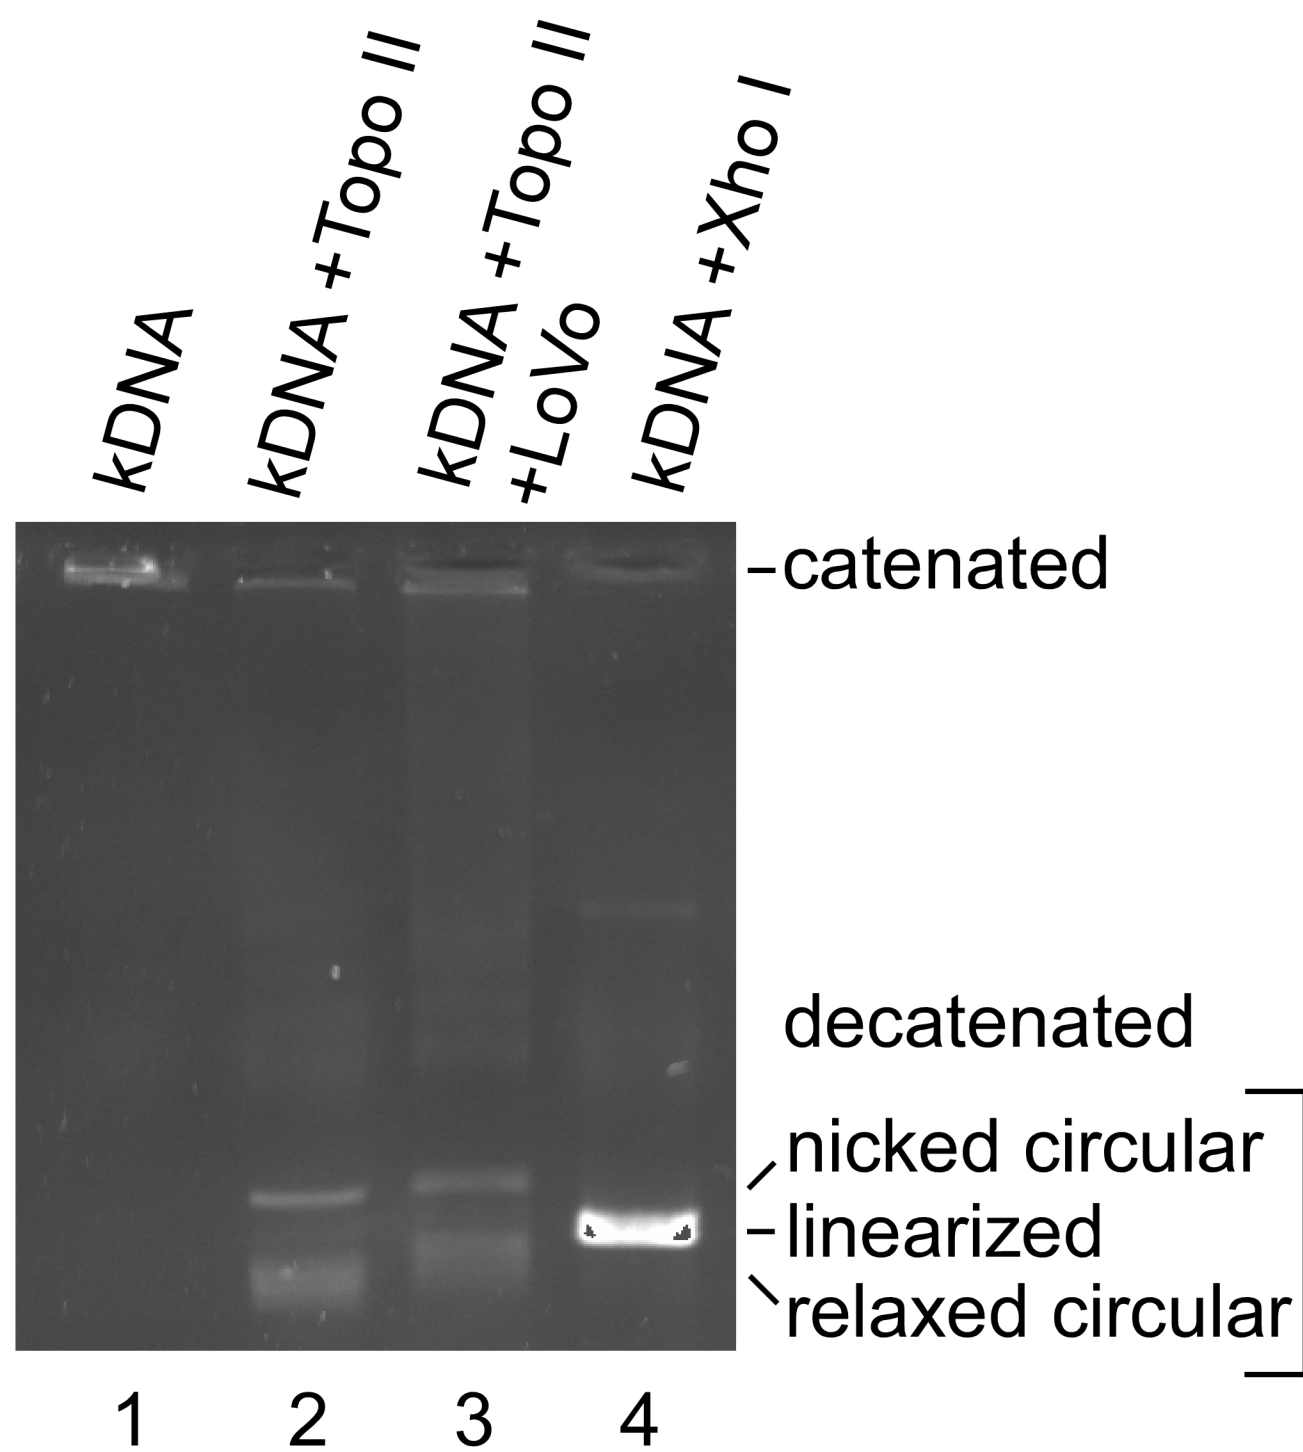

C

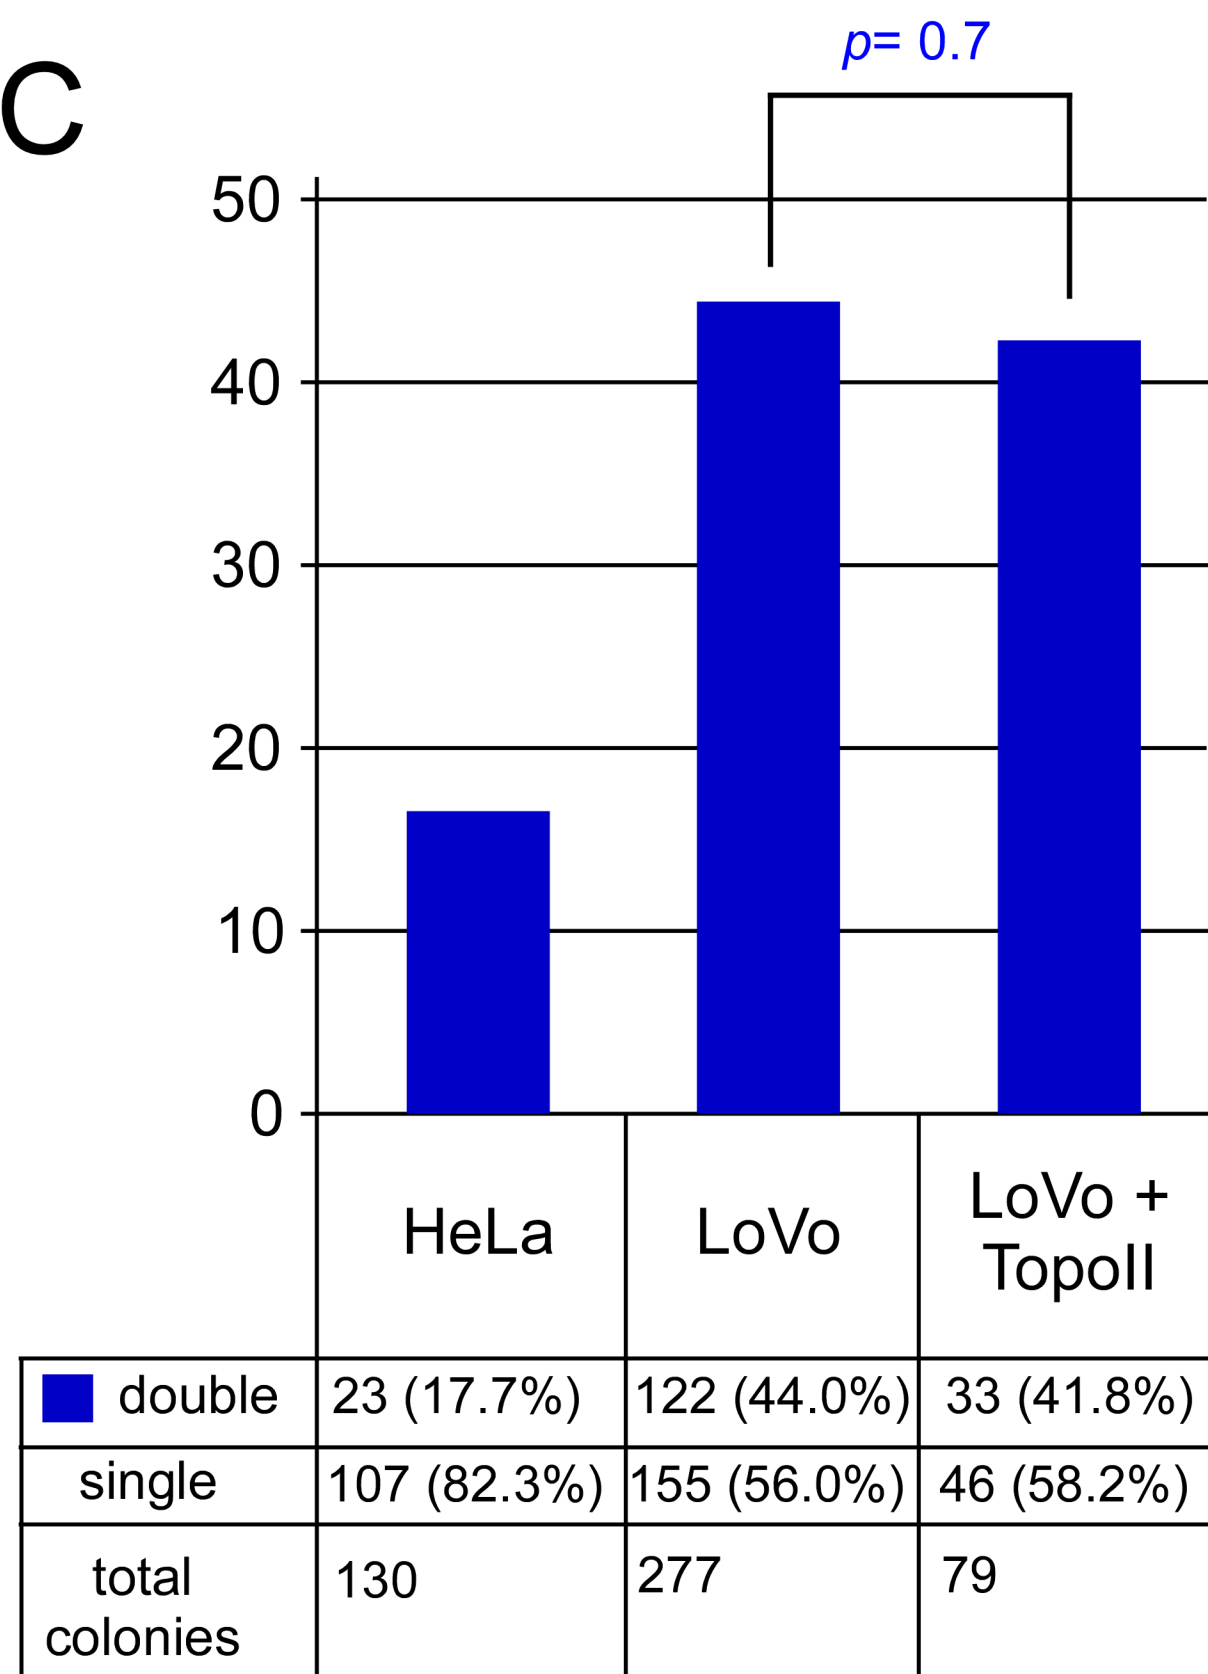

Supplement: NIHMS819325-supplement-Fig__S4.pdf [file NIHMS819325-supplement-Fig__S4.pdf]

# Supplementary Figure 5

A

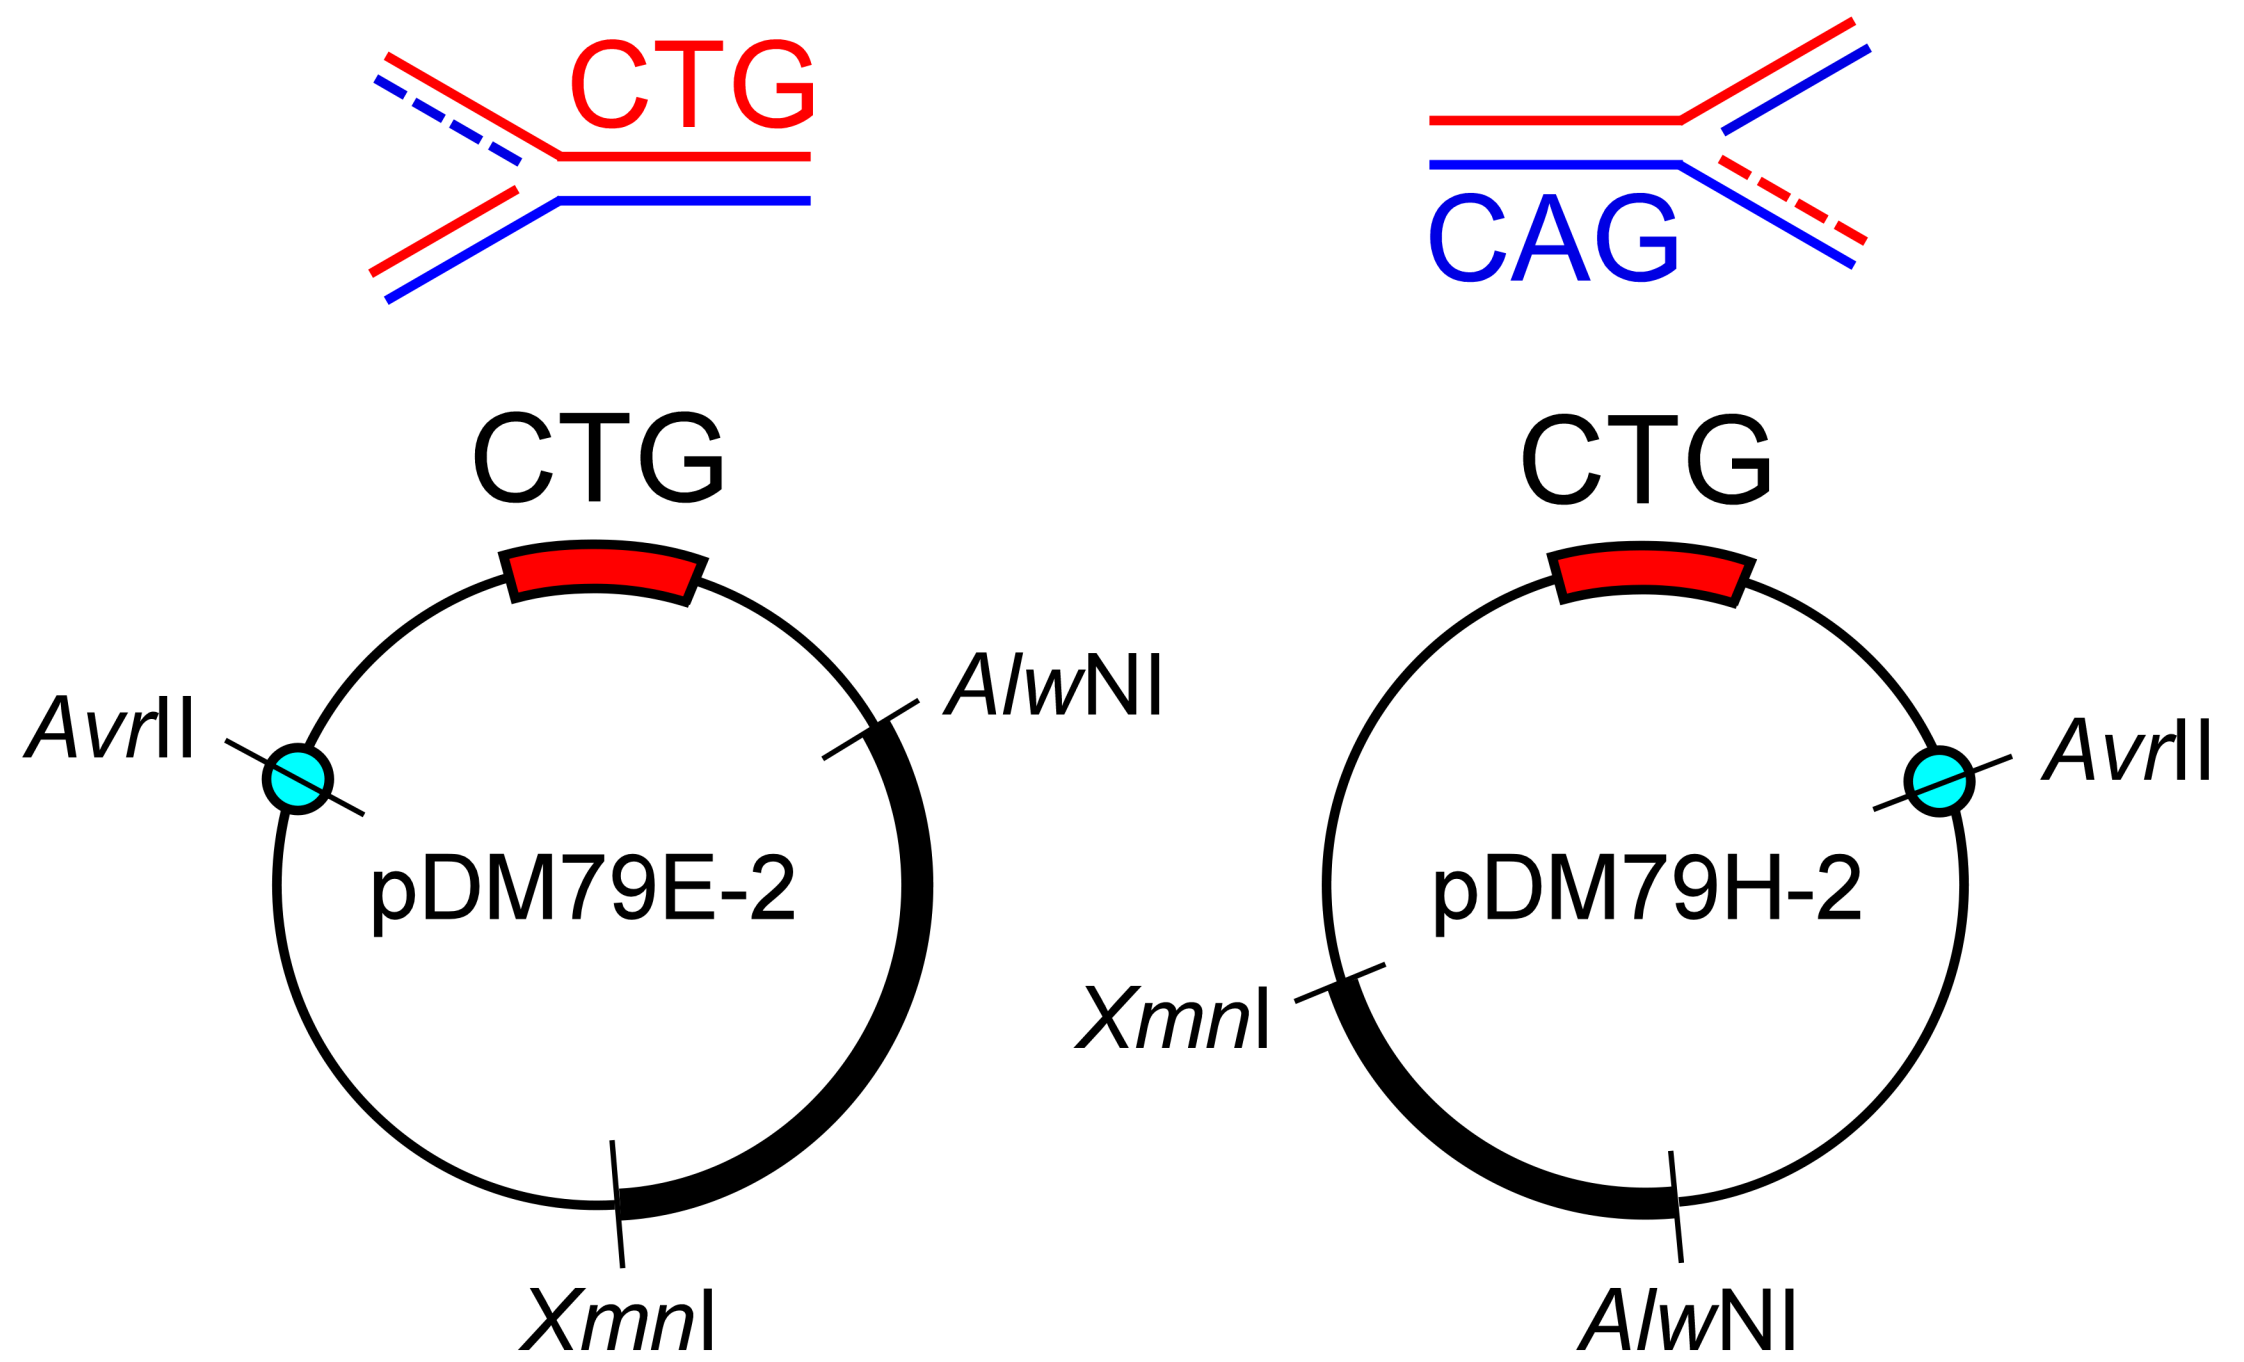

B

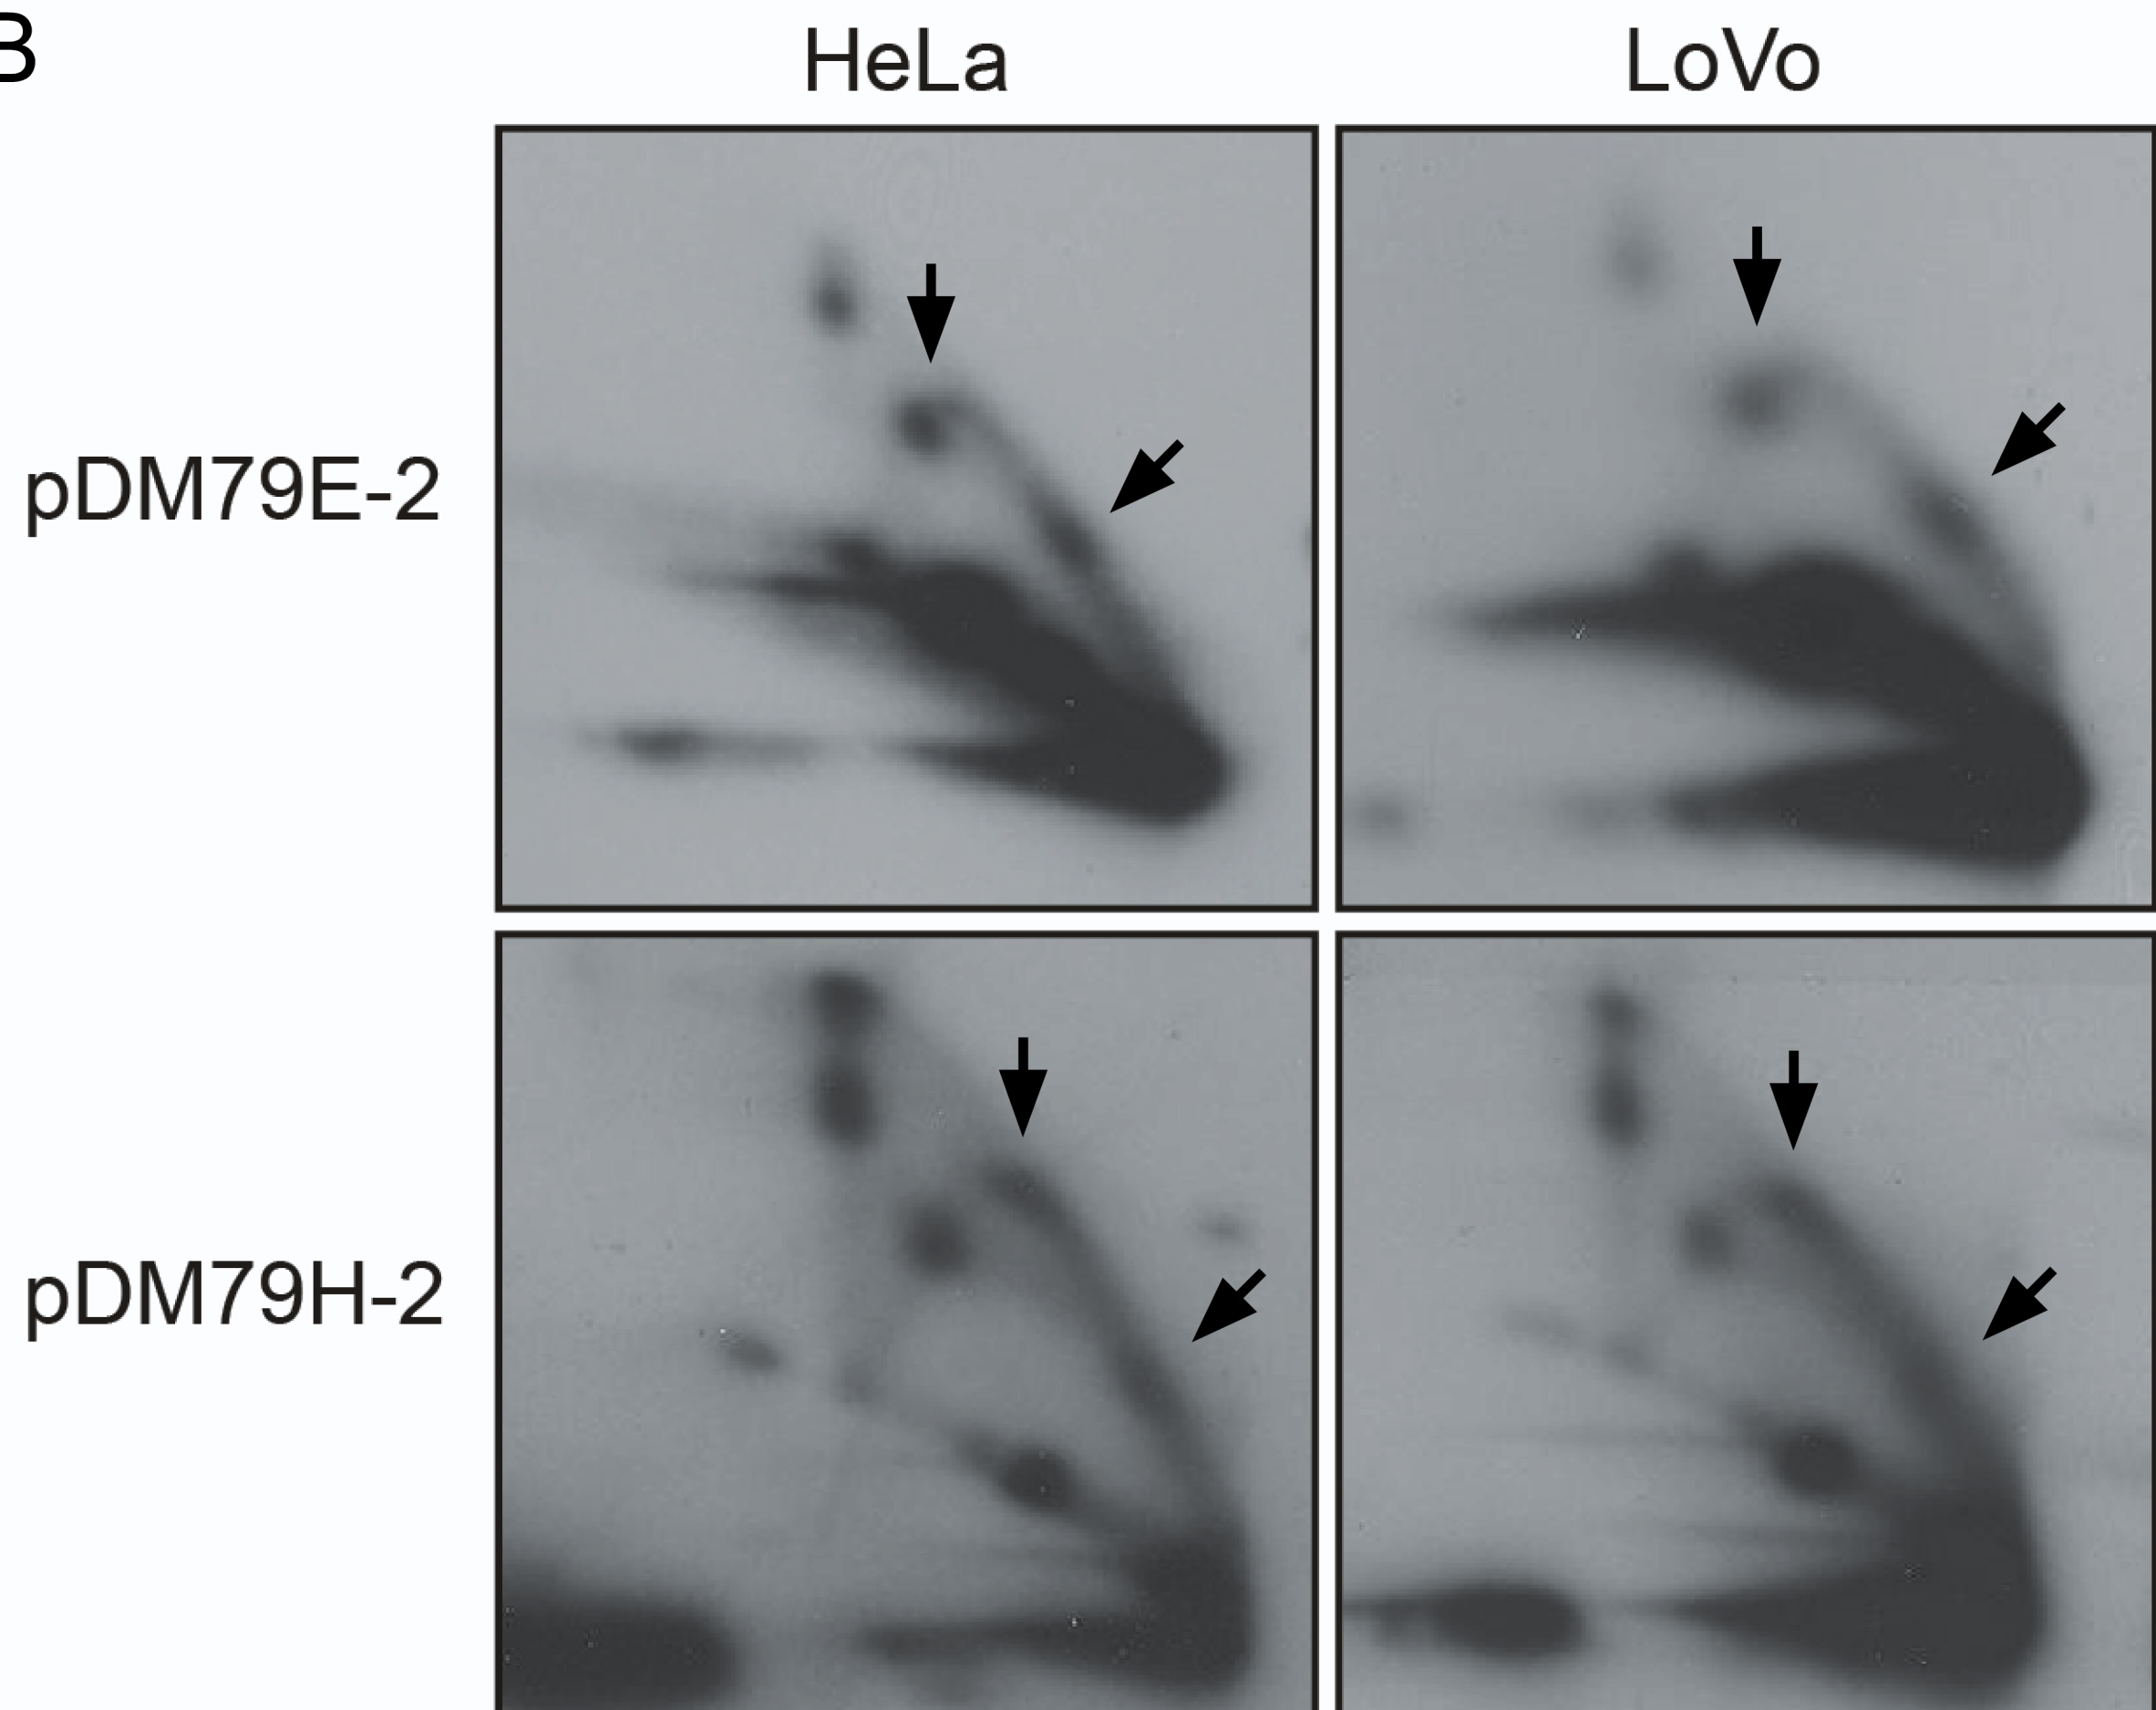

Supplement: NIHMS819325-supplement-Fig__S5.pdf [file NIHMS819325-supplement-Fig__S5.pdf]
